# Supplementary material for: Ambroxol as a disease-modifying treatment to reduce the risk of cognitive impairment in GBA-associated Parkinson’s disease: a multicentre, randomised, double-blind, placebo-controlled, phase II trial. The AMBITIOUS study protocol
Source: HighWire-hosted journal article supplement (doi:10.1136/bmjno-2023-000535), 2023-11-01
Supplement: bmjno-2023-000535supp002_data_supplement.pdf [file bmjno-2023-000535supp002_data_supplement.pdf]

**Supplemental Material 2.** Ambroxol titration scheme. The dose is increased by 200 mg daily every 5 days. The standard treatment dose (1.200 mg/day) is reached after 25 days.

| <b>Titration steps</b> | <b>Days</b> | <b>Daily dose (mg/day)</b> | <b>Administration (200 mg Tablets or Placebo)</b>      |
|------------------------|-------------|----------------------------|--------------------------------------------------------|
| 1                      | 1 – 5       | 200                        | One Tablet once daily (8 am)                           |
| 2                      | 6 – 10      | 400                        | One Tablet twice daily (8 am - 8 pm)                   |
| 3                      | 11 – 15     | 600                        | 1 Tablet at 8 am; 1 Tablet at 2 pm; 1 Tablet at 8 pm   |
| 4                      | 16 – 20     | 800                        | 2 Tablets at 8 am; 1 Tablet at 2 pm; 1 Tablet at 8 pm  |
| 5                      | 21 – 25     | 1000                       | 2 Tablets at 8 am; 1 Tablets at 2 pm; 2 Tablet at 8 pm |
| 6                      | 26 – 365    | 1200                       | 2 Tablets at 8 am; 2 Tablets at 2 pm; 2 Tablet at 8 pm |
